# Supplementary material for: Effects of Long-Term Physical Activity and Diet on Skin Glycation and Achilles Tendon Structure
Source: Nutrients. 2019 Jun 22;11(6):1409. doi: 10.3390/nu11061409 (PMC6627972; doi:10.3390/nu11061409)
Supplement: Supplementary file 1 [file nutrients-11-01409-s001.pdf]

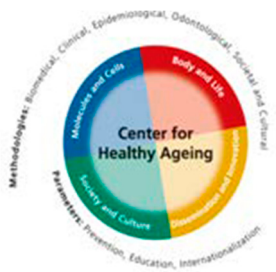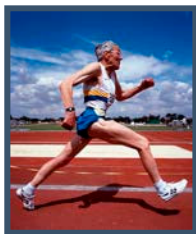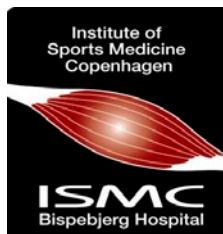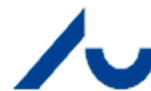

SECTION FOR SPORT SCIENCE  
DEPARTMENT FOR PUBLIC HEALTH  
AARHUS UNIVERSITY

## Questionnaire

FP-ID: \_\_\_\_\_

Name: \_\_\_\_\_ Date: \_\_\_\_\_

E-mail: \_\_\_\_\_

Mobile: \_\_\_\_\_

Nationality: \_\_\_\_\_

Age: \_\_\_\_\_

Height (cm): \_\_\_\_\_

Weight (kg): \_\_\_\_\_

Waist (cm): \_\_\_\_\_

## EMACs 2017

Which competitions have you or are you going to participate in:

Date: \_\_\_\_\_

Date: \_\_\_\_\_

Date: \_\_\_\_\_

Date: \_\_\_\_\_

Christian Couppé, Senior Researcher, PhD  
Center for Injury Prevention and Protection of Athlete Health  
Bispebjerg Hospital, Bispebjerg Bakke 23  
2400 Copenhagen NW

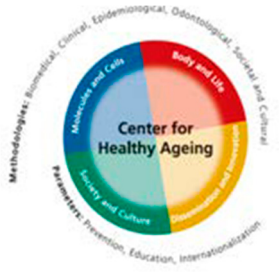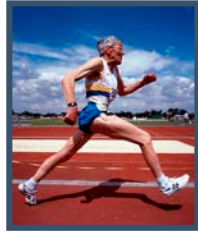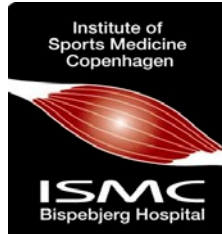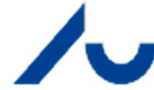

SECTION FOR SPORT SCIENCE  
DEPARTMENT FOR PUBLIC HEALTH  
AARHUS UNIVERSITY

### **Sports activities (total)**

**Hours per week with low/moderate intensity physical activities** (walking, light gymnastic etc  
< 70% of max heartrate)\_\_\_\_\_ (write number of hours)

**Hours per week with high intensity physical activities** (such as running, sport cycling, aerobic  
etc. > 70% af max heartrate)\_\_\_\_\_ (write number of hours)

**For how many years** during your life have you been regularly physically active at least two  
times per week?\_\_\_\_\_

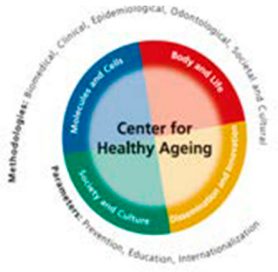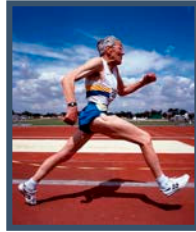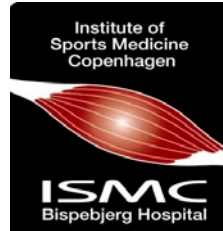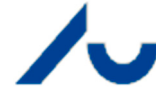

SECTION FOR SPORT SCIENCE  
DEPARTMENT FOR PUBLIC HEALTH  
AARHUS UNIVERSITY

## Diet:

We will now ask you questions related to your diet. Your answers should reflect your diet in the last 3 months up to today.

1. How often do you eat **fruit?**

\_\_\_ Less than 1 piece / week

\_\_\_ 1-2 pieces / week

\_\_\_ 3-4 pieces / week

\_\_\_ 5-6 Pieces / week

\_\_\_ 1 piece / day

\_\_\_ 2-3 pieces / day

\_\_\_ 4-5 pieces / day

\_\_\_ more than 6 piece / day)

2. How often do you eat **vegetables** (1 portion = about 100g) (potatoes are not included)

\_\_\_ Less than 1 portion / week

\_\_\_ 1-2 portions / week

\_\_\_ 3-4 portions / week

\_\_\_ 5-6 portions / week

\_\_\_ 1 portion / day

\_\_\_ 2-3 portions / day

\_\_\_ 4-5 portions / day

\_\_\_ more than 6 portions / day)

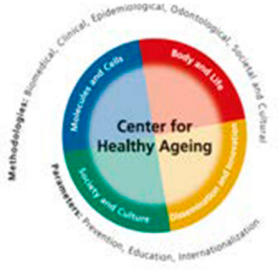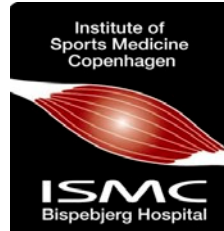

SECTION FOR SPORT SCIENCE  
DEPARTMENT FOR PUBLIC HEALTH  
AARHUS UNIVERSITY

3. How many times a week do you eat **fish?** (1 portion 100 g)

- ☐ Less than 1 portion / week
- ☐ 1-2 portions / week
- ☐ 3-4 portions / week
- ☐ 5-6 portions / week
- ☐ 1 portion / day
- ☐ 2-3 portions / day
- ☐ 4-5 portions / day
- ☐ more than 6 portions / day)

4. How many sliced **rye bread / whole grain bread** do you eat?

- ☐ Less than 1 slice / week
- ☐ 1-2 slices/ week
- ☐ 3-4 slices / week
- ☐ 5-6 slices / week
- ☐ 1 slice / day
- ☐ 2-3 slices / day
- ☐ 4-5 slices / day
- ☐ more than 6 slices / day)



SECTION FOR SPORT SCIENCE  
DEPARTMENT FOR PUBLIC HEALTH  
AARHUS UNIVERSITY

5. How often do you eat oat/whole grain cereals (1 serving = 1 dl)?

- \_\_\_ Less than 1 portion / week
- \_\_\_ 1-2 portions / week
- \_\_\_ 3-4 portions / week
- \_\_\_ 5-6 portions / week
- \_\_\_ 1 portion / day
- \_\_\_ 2-3 portions / day
- \_\_\_ 4-5 portions / day
- \_\_\_ + 6 portions / day)

6. How many cup of coffee?

- \_\_\_ Less than 1 cup / week
- \_\_\_ 1-2 cups / week
- \_\_\_ 3-4 cups / week
- \_\_\_ 5-6 cups / week
- \_\_\_ 1 cups/ day
- \_\_\_ 2-3 cups / day
- \_\_\_ 4-5 cups / day
- \_\_\_ + 6 cups / day)

7. How many glasses of wine?

- \_\_\_ Less than 1 glas / week
- \_\_\_ 1-2 glasses / week
- \_\_\_ 3-4 glasses / week
- \_\_\_ 5-6 glasses / week
- \_\_\_ 1 glasses/ day
- \_\_\_ 2-3 glasses / day
- \_\_\_ +4 glasses / day

Christian Couppé, Senior Researcher, PhD  
Center for Injury Prevention and Protection of Athlete Health  
Bispebjerg Hospital, Bispebjerg Bakke 23  
2400 Copenhagen NW

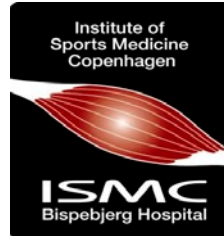

SECTION FOR SPORT SCIENCE  
DEPARTMENT FOR PUBLIC HEALTH  
AARHUS UNIVERSITY

8. How many bottles of **beer**?

\_\_\_ Less than 1 bottle / week

\_\_\_ 1-2 bottles / week

\_\_\_ 3-4 bottles / week

\_\_\_ 5-6 bottles / week

\_\_\_ 1 bottle / day

\_\_\_ 2-3 bottles / day

\_\_\_ +4 bottles / day

9. How many drinks of **liquors and spirits**?

\_\_\_ Less than 1 drink / week

\_\_\_ 1-2 drinks / week

\_\_\_ 3-4 drinks / week

\_\_\_ 5-6 drinks / week

\_\_\_ 1 drink / day

\_\_\_ 2-3 drinks / day

\_\_\_ +4 drinks / day

Total liters fluid per day? \_\_\_\_\_ and how many liters are pure water? \_\_\_\_\_

---

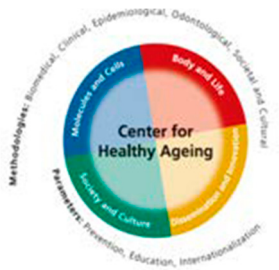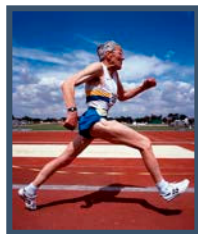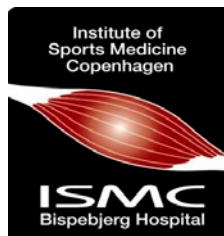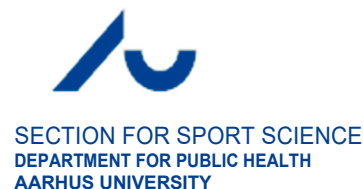

## **Description of your current diet pattern**

Below are two description of two diet patterns. How well do each of them **describe your current diet habits** (the average over the last 3 months).

| Diet pattern A                                                                                                                                                                                                                                                                                                                                                                                           | Diet pattern B                                                                                                                                                                                                                                                                                                                                                                                              |
|----------------------------------------------------------------------------------------------------------------------------------------------------------------------------------------------------------------------------------------------------------------------------------------------------------------------------------------------------------------------------------------------------------|-------------------------------------------------------------------------------------------------------------------------------------------------------------------------------------------------------------------------------------------------------------------------------------------------------------------------------------------------------------------------------------------------------------|
| <ul style="list-style-type: none"> <li>• Dense in energy</li> <li>• Rich in fat (butter)</li> <li>• Rich in red meat</li> <li>• Typical refined cereals rich in sugar</li> <li>• Food products rich in sugar and fat and salt</li> <li>• Often intake of soft drinks</li> <li>• Candy bars, desserts, sweet bakery goods, savoury snacks</li> <li>• Deep-fried potatoes, savoury snacks, etc.</li> </ul> | <ul style="list-style-type: none"> <li>• Rich in plant foods</li> <li>• Rich in fresh fruit</li> <li>• Plant oil primary fat source (e.g. olive oil and rapeseed oil)</li> <li>• Pulses</li> <li>• Cheese, yoghurt</li> <li>• Fish at least two times a week</li> <li>• Low to moderate consumption of wine</li> <li>• Only small amounts of red meat.</li> <li>• Only whole grain cereals/bread</li> </ul> |

0% = does not describe my diet habits at all. 100% = fits 100% with my diet habits.

Diet pattern A correspond to: \_\_\_\_\_% of my diet, and

Diet pattern B correspond to: \_\_\_\_\_% of my diet (In total: A + B = 100%)

## **Description of your previous dietary pattern (0-17 years old)**

How well does each of the descriptions above **describe your dietary habits until you became 17 yrs old**

Diet pattern A correspond to: \_\_\_\_\_% of diet before the age of 17 years, and

Diet pattern B correspond to: \_\_\_\_\_% of diet before the age of 17 years (In total: A + B = 100%)

Christian Couppé, Senior Researcher, PhD  
Center for Injury Prevention and Protection of Athlete Health  
Bispebjerg Hospital, Bispebjerg Bakke 23  
2400 Copenhagen NW

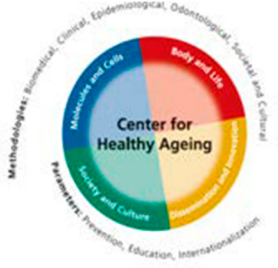

SECTION FOR SPORT SCIENCE  
DEPARTMENT FOR PUBLIC HEALTH  
AARHUS UNIVERSITY

Smoking: No, never\_\_\_\_\_

No, but were smoking 0-20 years ago\_\_\_\_\_ Duration\_\_\_\_\_ yrs

No, but were smoking more than 20 years ago \_\_\_\_\_ Duration\_\_\_\_\_ yrs

Yes, 0-7 cigarettes per week (1 cigarette per day)

Yes, 8-21 cigarettes per week (2-3 cigarettes per day)

Yes, more than 22 cigarettes per week (more than 3 cigarettes per day)
